# Supplementary material
Source: PubMed Central journal article supplement (PMC2154414)
Supplement: supp_0710519105_10519Fig8.pdf [file supp_0710519105_10519Fig8.pdf]

|         |                                                                                                    |     |
|---------|----------------------------------------------------------------------------------------------------|-----|
| Hs Mps1 | CI SVKGRI YSI LKQI GSGGSSKVFQVLN- EKKQI YAI KYVNLEEADNQT LDSYRNEI AY LNKLQQHSDKI I RLYDYEI T-      | 578 |
| Ms Mps1 | CI SVNGRI YSI LKQI GSGGSSKVFQVLN- EKKQI NAI KYVNLEDADSQT I ESYRNEI AFLNKLQQHSDKI I RLYDYEI T-      | 593 |
| Gg Mps1 | CI AVKGRI YTI LKQI GSGGSSKVFQVLN- EKKQLYAV KYVNLEEADQQT VESYKNEI AHL SKLQEHSDKI I RLYSYEI T-       | 611 |
| Xl Mps1 | CI VVKGRAYAVLKQI GTGGSSKVFQVMD- DKKHLYAI KYVNLEEADQQT I ESYQNEI SHLNKLQQHCDKI I RLFDYEI T-         | 615 |
| Dm Mps  | I LKI KNHEYTI DKKL GCGGSSSVFLARRS DSGNEFAL KVVDLQ- ADPQVVQGYLNETKL LAKLQGN- VCVVALYDYQLVR          | 406 |
| Sp Mps1 | VVT VANLQFI KLGVV GKGSSMRYRI FSP DNSRLYAL KEVNF I NADQTTI QGYKNEI AL LRKL SGN- DRI I KLYAAEVND     | 386 |
| Sc Mps1 | I I TVNDSQYEKI ELL GRGGSSRVYK VKG- SGNRVYAL KRVS FDAF DDSS I DGF KGEI ELLE KLKDQ- KRVI QL LDYEMG-  | 508 |
|         |                                                                                                    |     |
| Hs Mps1 | - DQYI YMVMECGNI DLNSWLKKKKS - - I DPWERKSYWKNML EAVHTI HQHGI VHS DL KPANFLI VDGML KLI DFGI ANQM   | 655 |
| Ms Mps1 | - EQYI YMVMECGNI DLNSWLKKKKS - - I NPWERKSYWKNML EAVHI I HQHGI VHS DL KPANFVI VDGML KLI DFGI ANQM  | 670 |
| Gg Mps1 | - DQHI YMVMECGNI DLNSWLKKKRN - - I DPLERKSYWKNML EAVHTI HEHGI VHS DL KPANFLI VDGML KLI DFGI ANQM   | 688 |
| Xl Mps1 | - DQHI YMVMECGNI DLNTWLRKKKT - - I NPWERKSYWKNML EAVHTI HQHGI VHS DL KPANFLI VDGML KLI DFGI ANQI   | 692 |
| Dm Mps1 | EESKL YMVMEKGDCLNKI LQSYTTN- LPLYSLMNI LYQML QAVNYI HQHGI VHS DL KPANFLM VSGRL KLI DFGI ASNI       | 485 |
| Sp Mps1 | TLGQL NMVMECGETDLANL LMKNMKPI NLNFI RMYWEQML EAVQVVHDQNI VHS DL KPANFL LVEGNL KLI DFGI AKAI        | 466 |
| Sc Mps1 | - DGLL YLI MECGDHDL S QI LNQRSGMPL DFNFRF YTK EML LCI KVVHDAGI VHS DL KPANFVLV KGI LKI I DFGI ANAV | 587 |
|         |                                                                                                    |     |
| Hs Mps1 | QPDTT SVVKDSQVGT VNYMPPEAI KDMSSSR - - - - ENKSKSKI SPKSDVWSL GCI LYYMTYGKTPFQI I NQI S KL HAI     | 731 |
| Ms Mps1 | QPDTT SI VKDSQVGT VNYMAPEAI RDMSSSR - - - - ENSKI RTK VSPRSDVWSL GCI LYYMTYGRTPFQHI I NQVSKL HAI   | 746 |
| Gg Mps1 | QPDVT SI VKDSQVGT MNYMPPEAI QDMSSSYG - - - - ENKSSQSKI SPKSDVWSL GCI LYCMTYGRTPFQHI T NTRKKL YAI   | 765 |
| Xl Mps1 | QPDVT SI VKDSQVGT I NYMPPEI RDTT SYA - - - - ENKPRS KI SPKGDVWSL GCI LYCMTYGRTPFQHI T NQI AKL HSI  | 768 |
| Dm Mps1 | AVDST SI I KFSQA GTFNYI SPEALTD T STGNSPMRRADQPKI KI STKSDVWSL GCI LYLL YQKTPFQHI RNVYAKMSAI       | 565 |
| Sp Mps1 | GNDTT NI HRDSHI GTI NYMAPEAL TDMNAHT - - - - NSGVKL V KLGRPSDVWSL GCI LYQMVYGRAPFAHLK- MI QAI AAI  | 541 |
| Sc Mps1 | PEHTVNI YRET QI GTPNYMAPEALVAMNYTQNSENQHEGNK W VGRPSDMWSC GCI I YQMI YGKPPYGSFQ- GQNRLLAI          | 666 |
|         |                                                                                                    |     |
| Hs Mps1 | I DPNHEI EFPDI PEKD- - - - - LQDVL KCCL KRDPKQRI SI PELL AHPYVQI QTH                               | 780 |
| Ms Mps1 | I NPAHEI EFPEI SEKD- - - - - LRDVL KCCL VRNPKERI SI PELL THPYVQI QPH                               | 795 |
| Gg Mps1 | VDPHYEI EFPDI AEKD- - - - - LQDVL KRCL VRNPKQRI SVSELL VHPYVQI QTQ                                 | 814 |
| Xl Mps1 | LDPGYEI EFPNI PEKD- - - - - LQDVL RKCL VRNPKERI SI AELL VHPYVQI QPH                                | 817 |
| Dm Mps1 | TTPGT SI EYPAI PYYPI M- - - - - LVHMA KNCL QLNPKKRPSCTELL QYPFHMI I PL                             | 617 |
| Sp Mps1 | PNEYQYHI HFPEVAL PANAVQEKE GSLPGVTVGPDL MDVMKRCL ERDQRKRL TI PELL VHPFLNPL PS                      | 608 |
| Sc Mps1 | MNPDVKI PFPEHTSNNEKI P- - - - - KSAI ELMKACL YRNPKRWTVDKVL SSTFLQPFMI                              | 721 |

Figure S1
