# Supplementary material
Source: PubMed Central journal article supplement (PMC2154414)

Interphase

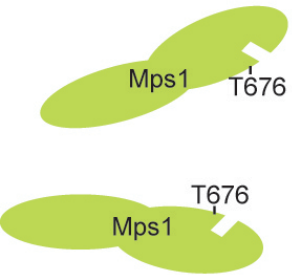

Mitosis

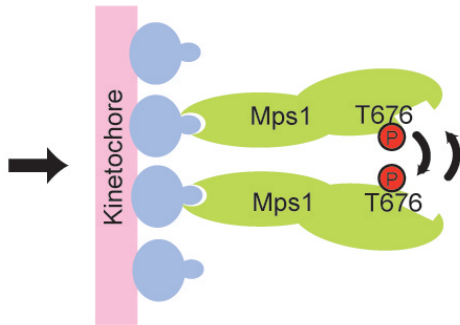

Mitosis

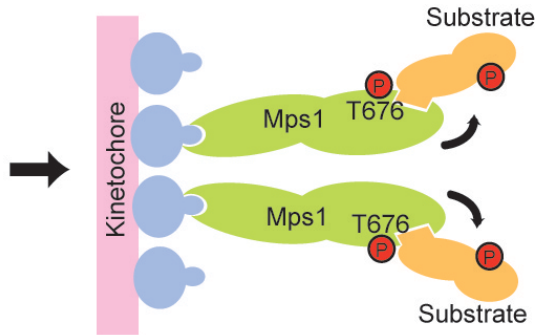

Supplement: supp_0710519105_10519Fig7.pdf [file supp_0710519105_10519Fig7.pdf]

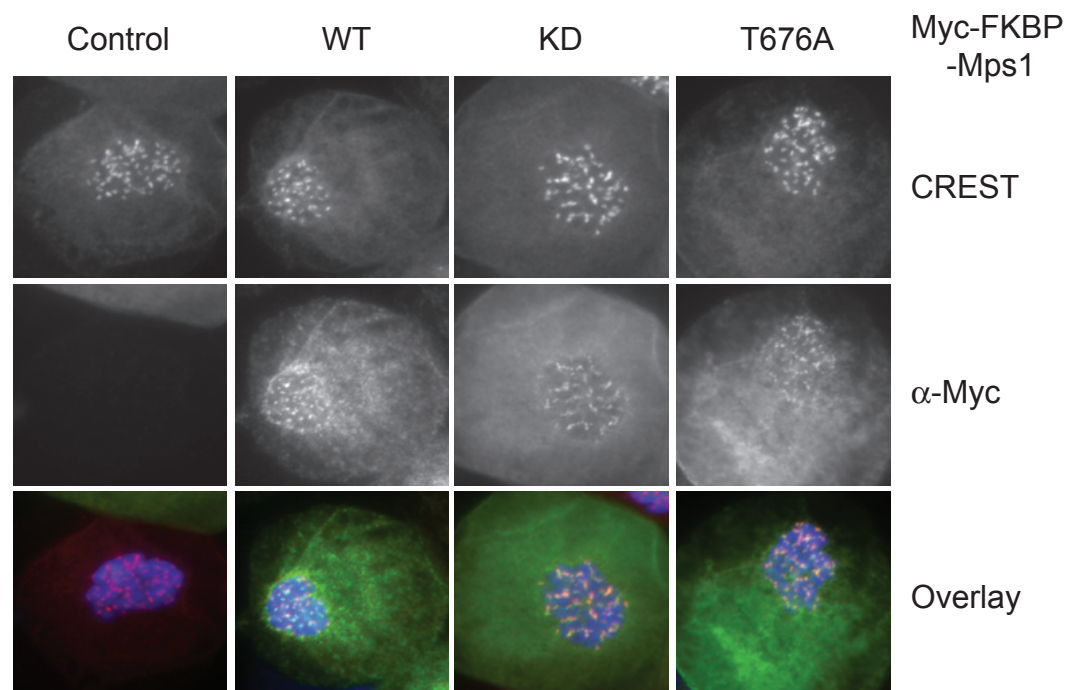

**Figure S2**

Supplement: supp_0710519105_10519Fig9.pdf [file supp_0710519105_10519Fig9.pdf]
